# Supplementary material
Source: Springer Nature journal article supplement (https://www.springermedizin.de/resource/supplementary/12933_2010_328_MOESM3_ESM.pdf/9538158)

**Estimated GFR  $\geq$  60 ml/min**

**Estimated GFR  $<$  60 ml/min**

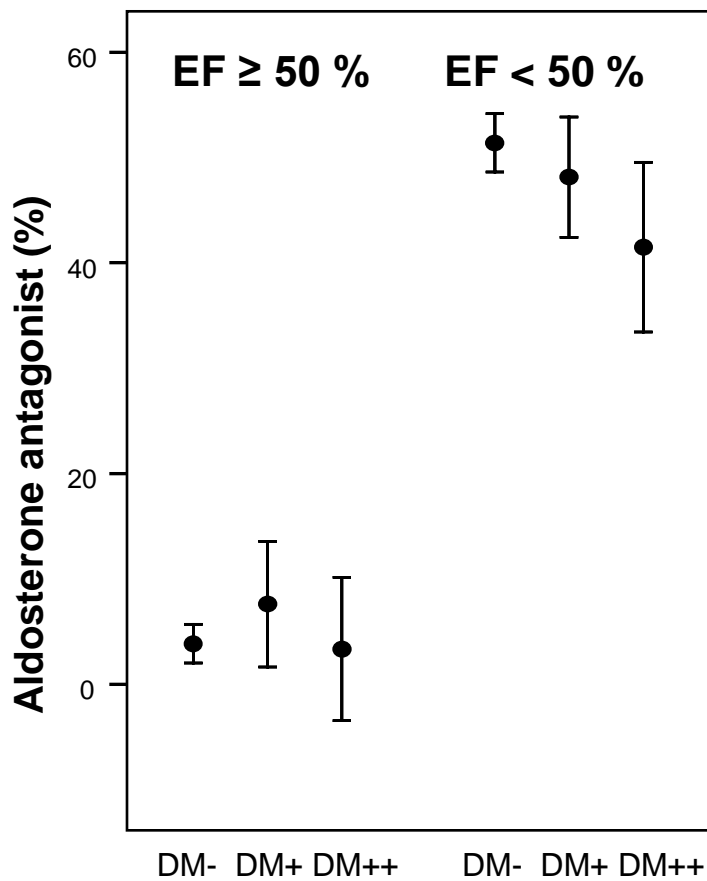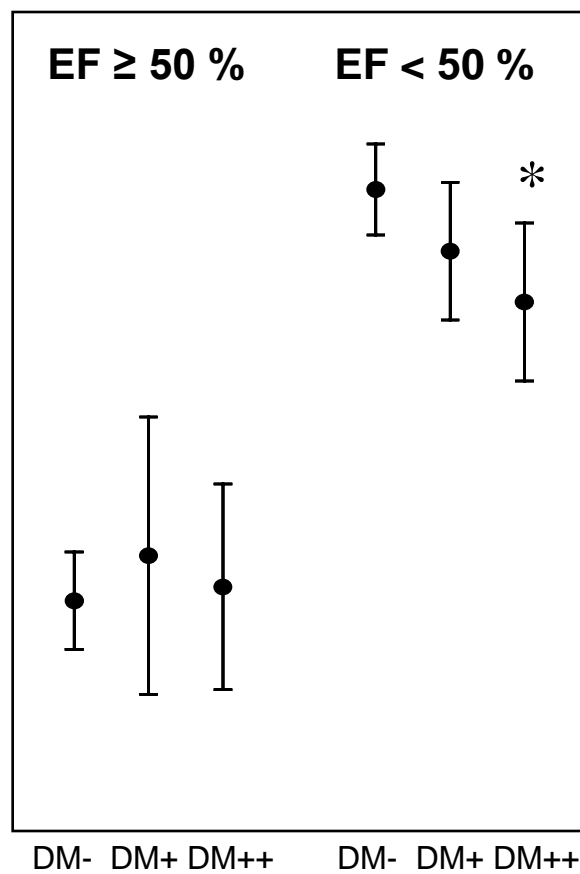

\* p < 0,05

Supplement: MOESM3 [file 9538158]
